# Supplementary material for: The hydrological cycle and ocean circulation of the Maritime Continent in the mid-Pliocene: results from PlioMIP2
Source: Copernicus journal article supplement (doi:10.5194/egusphere-2022-1281), 2022-12-07
Supplement: Supplementary file 1 [file egusphere-2022-1281-supplement.pdf]

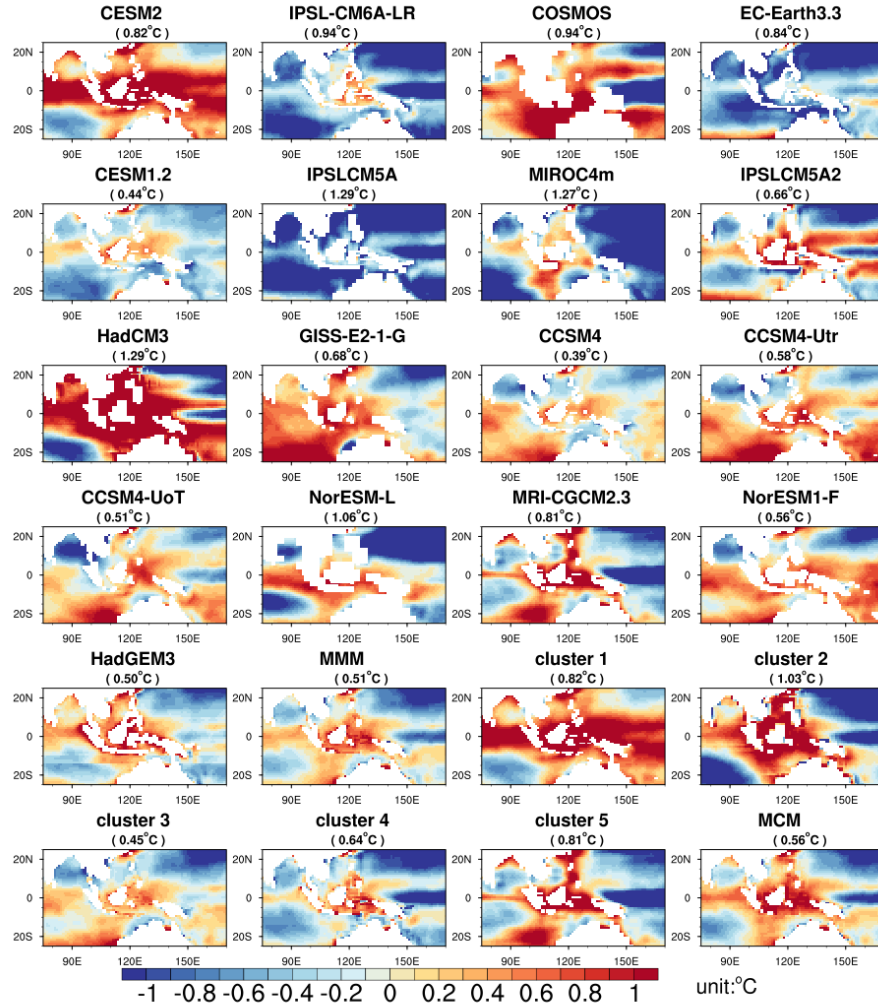

**Figure S1.** SST anomalies over the MC from individual models in the pre-industrial (E280) relative to HadISST1 reanalysed SSTs. Numbers in brackets indicate the RMSE between HadISST1 SSTs and model SSTs over the MC for each model.

**Table S1.** The discrepancy values between individual model and data. Unit: °C

| Model name   | Eoi400 discrepancy | E280 discrepancy | E280 discrepancy<br>(bias adjusted) |
|--------------|--------------------|------------------|-------------------------------------|
| CESM2        | 2.28               | 0.82             | 0.63                                |
| IPSL-CM6A-LR | 1.58               | 0.94             | 0.56                                |
| COSMOS       | 1.73               | 0.94             | 0.91                                |
| EC-Earth3.3  | 2.17               | 0.84             | 0.53                                |
| CESM1.2      | 1.77               | 0.44             | 0.35                                |
| IPSLCM5A     | 1.52               | 1.29             | 0.62                                |
| MIROC4m      | 1.62               | 1.27             | 0.92                                |
| IPSLCM5A2    | 1.58               | 0.66             | 0.65                                |
| HadCM3       | 1.52               | 1.29             | 1.14                                |
| GISS-E2-1-G  | 1.52               | 0.68             | 0.64                                |
| CCSM4        | 1.58               | 0.39             | 0.39                                |
| CCSM4-Utr    | 1.93               | 0.58             | 0.52                                |
| CCSM4-UoT    | 1.62               | 0.51             | 0.50                                |
| NorESM-L     | 1.62               | 1.06             | 0.96                                |
| MRI-CGCM2.3  | 1.58               | 0.81             | 0.81                                |
| NorESM1-F    | 1.62               | 0.56             | 0.54                                |
| HadGEM3      | 2.08               | 0.50             | 0.50                                |
| MMM          | 1.58               | 0.51             | 0.50                                |
| cluster 1    | 2.28               | 0.82             | 0.63                                |
| cluster 2    | 2.28               | 1.03             | 1.03                                |
| cluster 3    | 1.58               | 0.45             | 0.44                                |
| cluster 4    | 1.58               | 0.64             | 0.55                                |
| cluster 5    | 1.58               | 0.81             | 0.81                                |
| MCM          | 1.62               | 0.56             | 0.56                                |

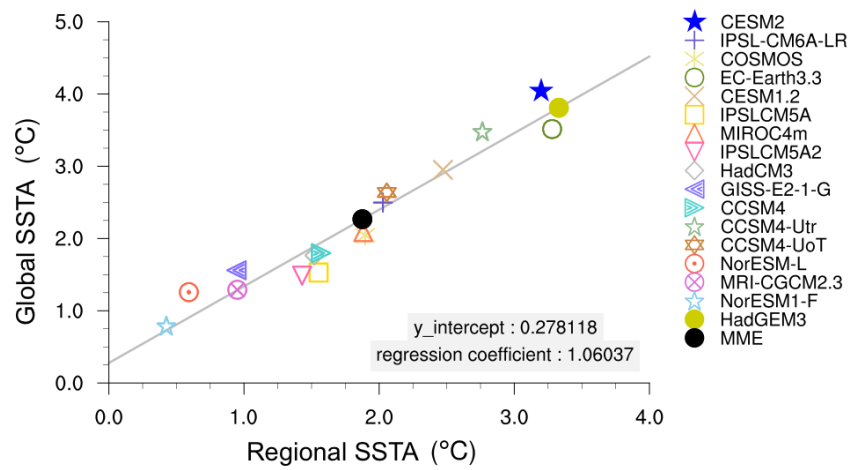

**Figure S2.** The comparison of the global SSTAs and the mean SSTAs over the MC.

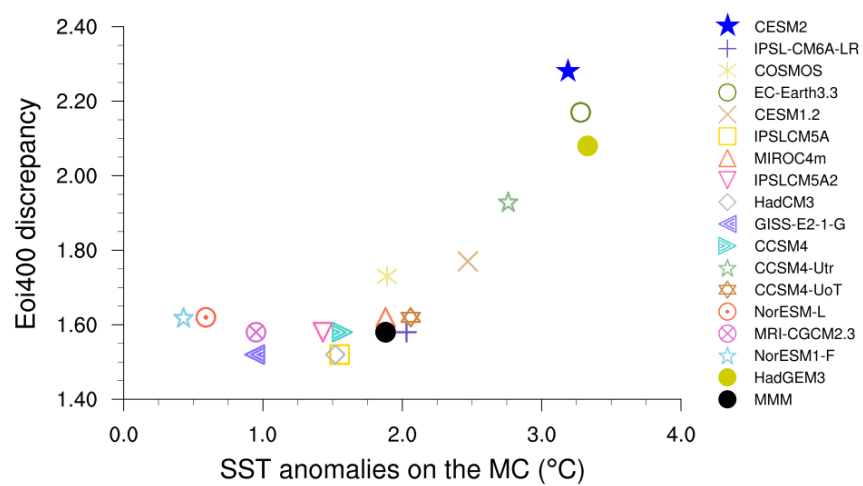

**Figure S3.** The comparison of the SSTAs averaged over the MC and the Eoi400 discrepancy with proxy.

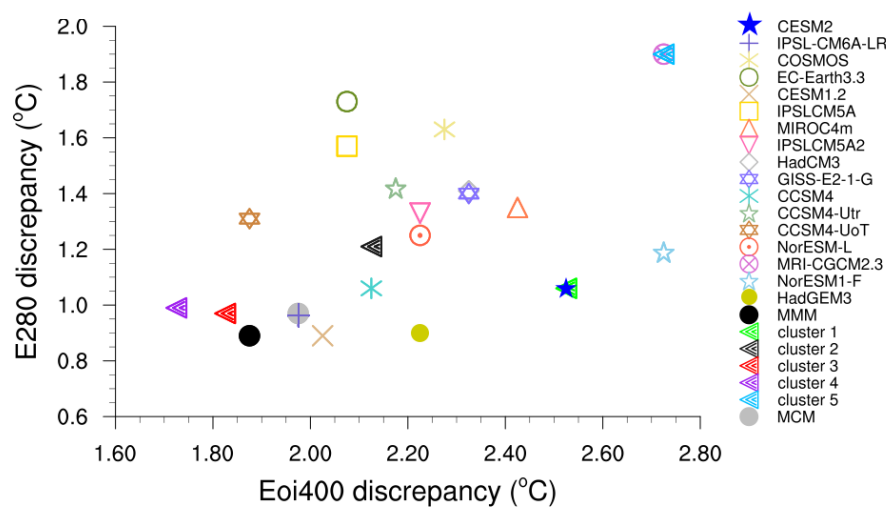

**Figure S4.** Comparison of the model and data discrepancies at the global scale between the E280 and Eoi400 simulations.

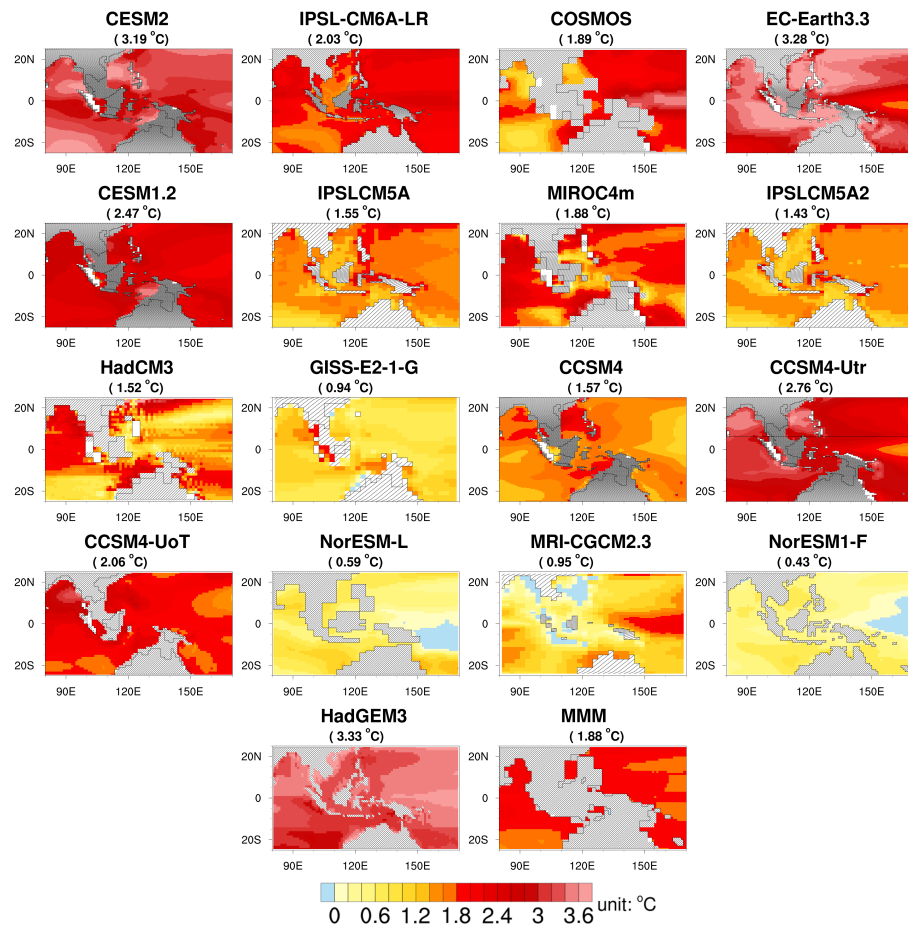

**Figure S5.** SSTA over the MC from individual models in the mid-Pliocene simulation (Eoi400) relative to the preindustrial simulation (E280). Numbers in brackets indicate the regional mean SST anomalies for each model.

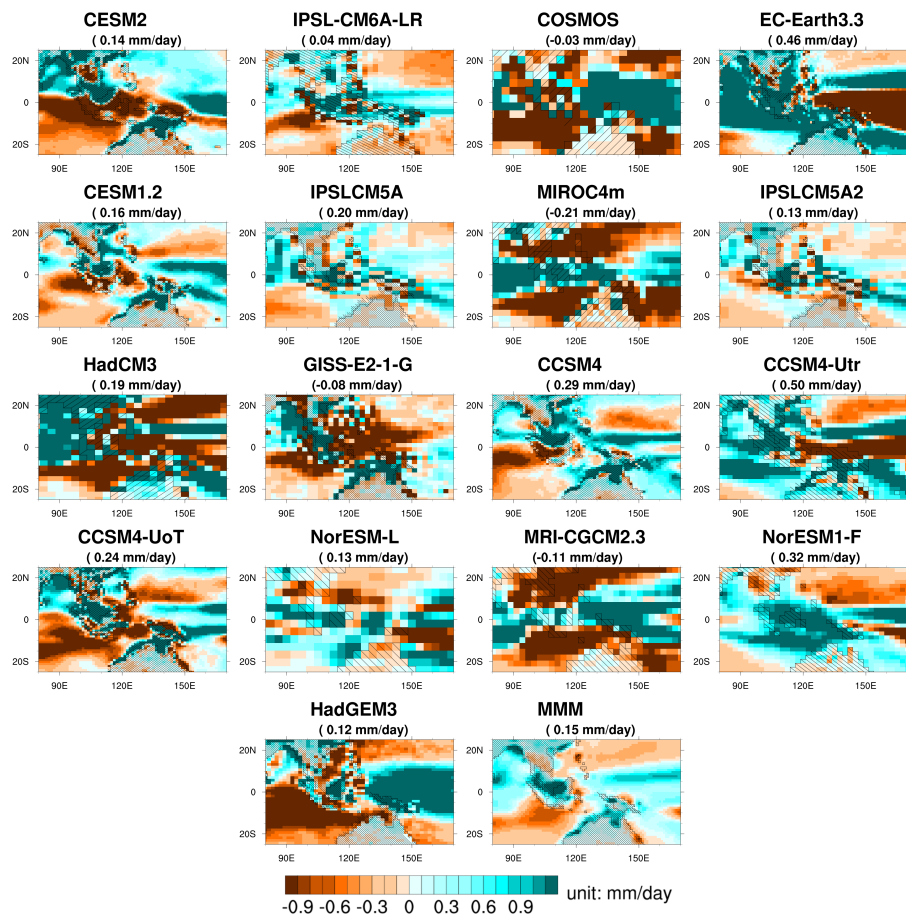

**Figure S6.** Same as Figure S5 but for precipitation minus evaporation (P-E).

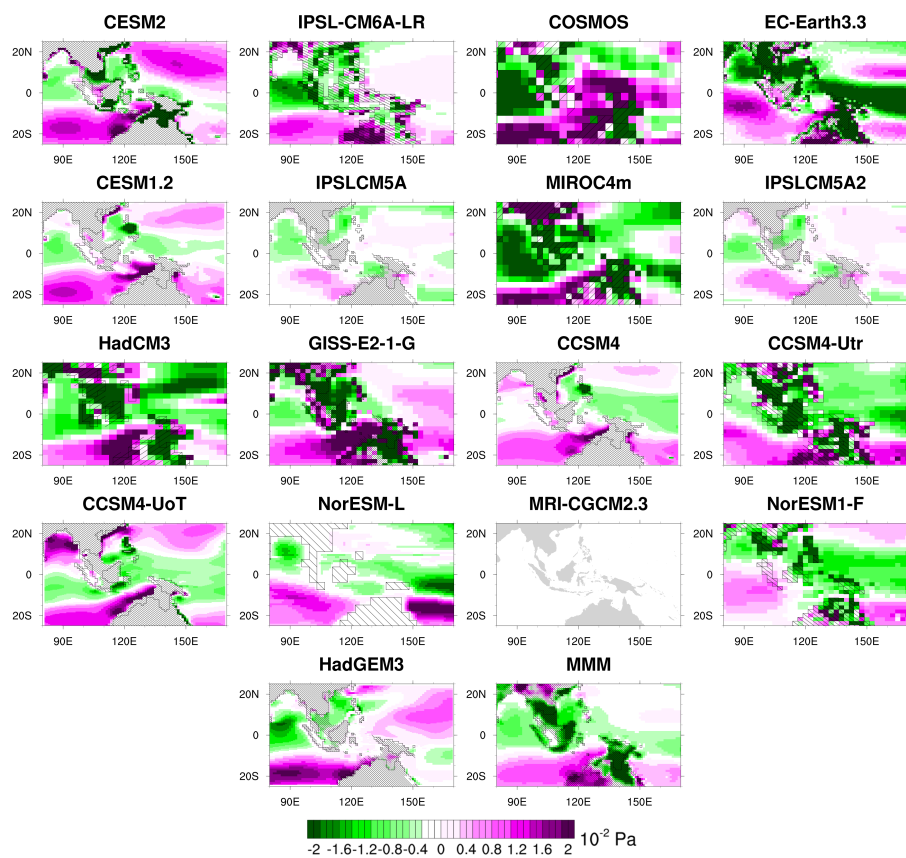

**Figure S7.** Same as Figure S5 but for zonal wind stress. Green shading indicates westward tendency and yellow shading indicates eastward tendency. Unit: Pa.



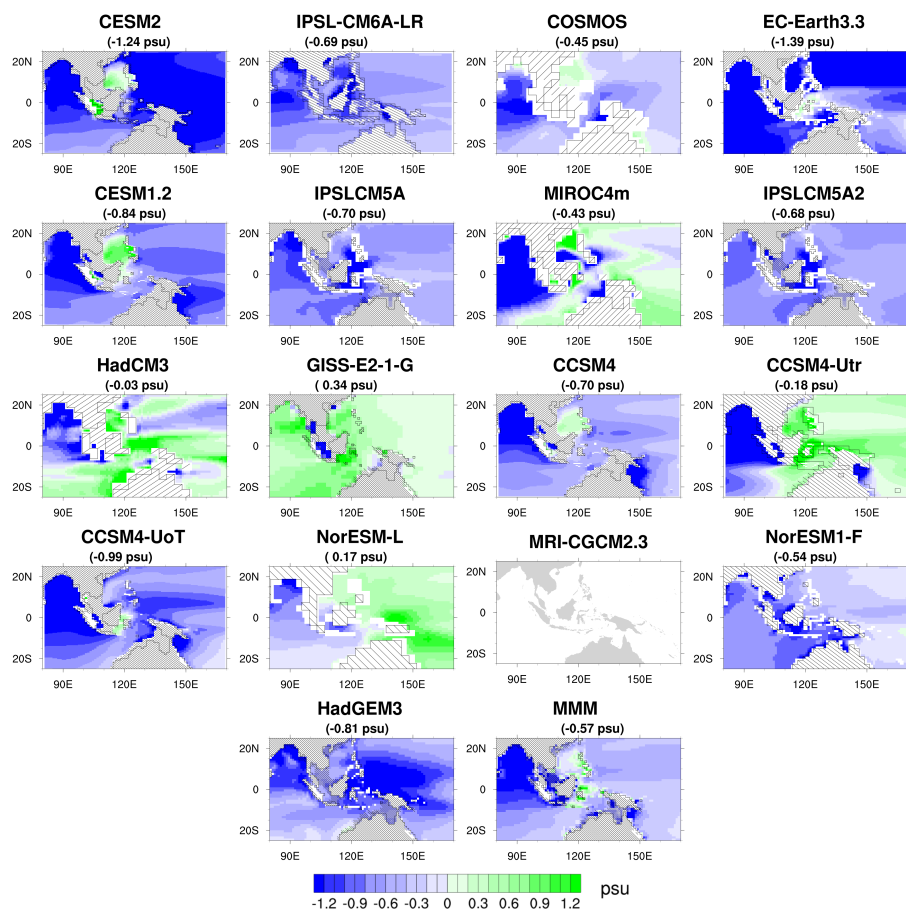

**Figure S8.** Same as Figure S5 but for SOS.

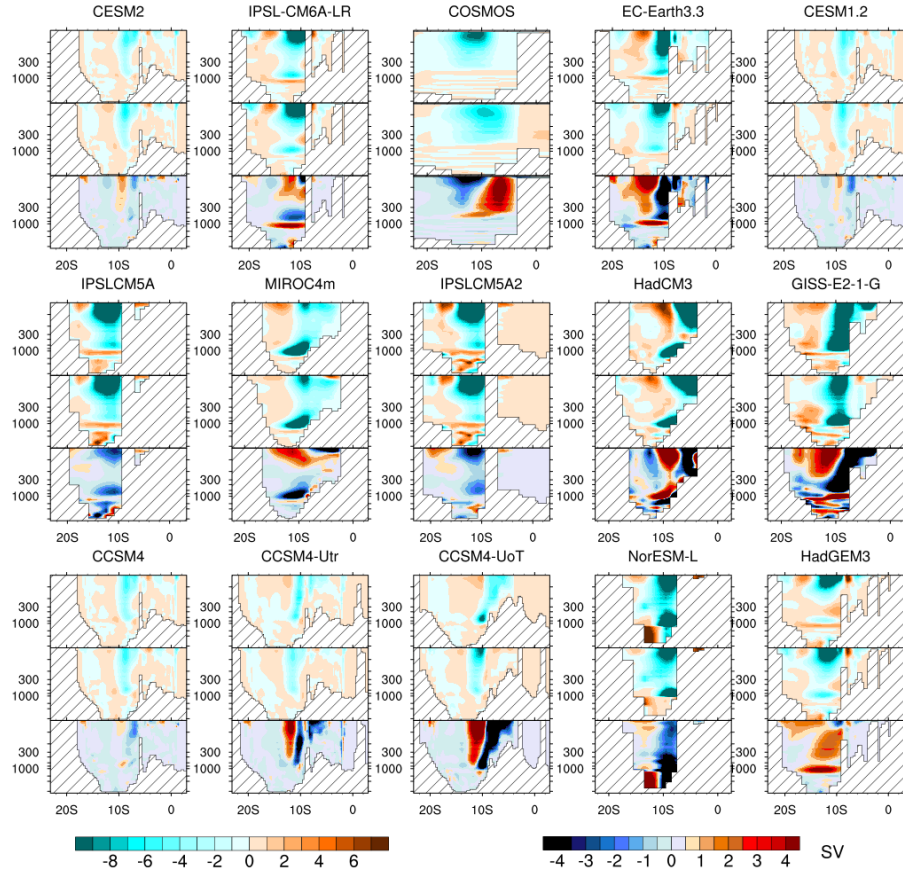

**Figure S9.** The profiles of the ocean current through the MC in the mid-Pliocene (top panel for each model), in the preindustrial (middle panel for each model) and the anomalies of the mid-Pliocene relative to preindustrial (bottom panel for each model). Warm shading indicates direction from west to east. Cold shading indicates direction from east to west.
