# Supplementary material for: The hydrological cycle and ocean circulation of the Maritime Continent in the mid-Pliocene: results from PlioMIP2
Source: Copernicus journal article supplement (doi:10.5194/egusphere-2022-1281), 2022-12-07
Supplement: Supplementary file [file egusphere-2022-1281-AC3-supplement.pdf]

Thank you so much for your constructive comments and suggestions. It helps us to improve our manuscript a lot.

Here are our point-to-point responses.

The original review comments are shown in blue, and our responses in **black**.

#### **Major comments:**

- ✓ The analysis and methods used by the authors are not sufficient to achieve their central objective. First, the hydroclimate of the MC is very complex and is under the influence of changes in mean state features (such as Hadley and Walker circulation, ITCZ position and the warming itself) and important internal modes of variability (such as ENSO, IOD and IOBW). Secondly, the study focuses on a very small region around the MC, from which is not possible to obtain a picture of the large-scale dynamics. Many results are described in terms of the small scales changes around the MC (i.e., North-eastern coast of New Guinea, central MC, gateway between MC and Australia, etc), which are not possible to be evaluated from the coarse resolution of the PlioMIP models. Additionally, the PlioMIP models are required to apply substantial changes in the land-sea mask in the MC and are of coarse resolution (some up to 4 degrees in the atmosphere), making its small-scale evaluation very difficult and uncertain. Furthermore, it is not possible to infer how the MC hydroclimate was during the Pliocene by simply evaluating the basic fields described in section 3.2. I recommend the authors to expand their study area to include the Pacific and Indian ocean changes, as well as southern Asia, which is a large land mass above the MC, where any small temperature changes may affect the atmospheric circulation and ITCZ position. Also, to evaluate the MC hydroclimate the authors must show results of Hadley and Walker circulations and the possible influence of changes in the main modes of variability (ENSO and IOD).

**A: (a) Following your suggestion, we will expand our study area so that large scale information can be seen.**

**(b) We agree that these internal modes of variability are related to the mean state, which is the focus of this manuscript, so we will draw on results from other papers to discuss them more appropriately. In particular, some of these modes have been studied previously in other papers analysing the PlioMIP ensemble (e.g. Oldeman et al. 2021; Pontes et al. 2021). We will reference and discuss these papers where appropriate to provide more context to our analysis. In addition we will discuss changes in the Hadley and Walker circulations in our revised paper.**

**Regarding to the changes in the land-sea mask in the MC, the experiment of the mid-Pliocene does not only make changes in the land-sea mask in this small region but also other regions such as Bering Strait and Canadian Archipelago based on the reconstruction of this period. So the climate changes locally are not only forced by the local topography change but also changes in other regions**

- ✓ It is not clear how three of the result's sections (3.2, 3.3, 3.4) are linked to each other. These sections seem very independent from one another without a clear justification on why choosing these analyses to compose the manuscript. Section 3.2 must include more elements as mentioned above. In Section 3.3, the authors must show, through analyses, what the relative effect of an increased ITF in the mean MC hydroclimate is. After incorporating these new results,

the authors will evaluate the utility of performing a cluster analysis (comment #7). In order to provide a comprehensive story of the MC climate, each analysis must be clearly justified.

**A: We will integrate these sections more clearly and put a paragraph in each section to show the linkage between different sections and how the results of each section feeds in the other sections. In addition, we have decided to reorganize our sections, to make the linkages clearer, in particular we are considering moving section 3.1 before section 3.4. Regarding to section 3.2 and section 3.3, we will also add analyses of the relationship between ITF strength and other variables such as temperature gradients across the Indian and Pacific Ocean, salt gradient, and zonal wind strength.**

- ✓ The authors have not performed any statistical significance analysis of the fields and processes evaluated. As such, it is not possible to know what the major changes simulated by most of the models are, and how these could be related to one another. Performing statistical significance analyses for each result is crucial before publication.

**A: We will add statistical significance indicators to all the Figures.**

- ✓ In section 3.1, I suggest removing the cluster results for Figure 3. At this point of the manuscript the authors have not provided enough information of the cluster analysis and can confuse the readers. The analysis shown in Figure 4 is not very elucidative. Comparing discrepancies is very uncertain, especially for the mid-Pliocene where proxy-data show larger uncertainties. Is there any precipitation record in the MC that the authors could compare the Pliocene results to? Borneo?

**A: As stated above, we will move this section to later in the manuscript, in order to improve clarity.**

**Regarding to Figure 4, also in response to Tripti's online comment, we will add discussion to this section on the uncertainties associated with the discrepancy. In terms of the precipitation record, also in response to Reviewer 1, we will add a comparison with proxy precipitation data in this region.**

- ✓ In section 3.2, the authors analyse SST and P-E changes by averaging these variables over the study area. However, the study area encompasses the Indian and Pacific oceans as well as many artificial the occur due to a modified land-sea mask in the mid-Pliocene. As such, this is not a good metric to evaluate the MC climate.

**A: Thank you for this suggestion. In terms of SST and SOS, we agree that there are some potentially artificial changes due to changes in land-sea mask, and we will account for this in the regional means. However, for P-E the changes real, and potentially important for climate.**

- ✓ In section 3.3, the authors again try to address specific questions that are not possible to be addressed because either the study area is too restricted or because of low resolution of the models. To address where the salt or heat anomalies originate from, it would be necessary to evaluate the large-scale heat and salt budget. It is not possible address whether the ITF anomalies originate from the surface or deep due to coarse resolution of the model and because

of the land-sea masks, which will likely have different effects in each model due their different resolutions. I suggest the authors to focus on the possible role of the ITF transport on the MC hydroclimate. I am also very confused on what is being shown on Figure 8. The legend says 'ocean current' but the unit is Sv, which is a unit of transport.

**A: We will expand our study region out to include the larger area that is associated with the Indonesian Throughflow, and will add some discussion on the relationship between the ITF and MC hydroclimate.**

**Regarding to the legend of Figure 8, thank you for pointing this out, we will change it to "ocean volume transport".**

- ✓ In my understanding a cluster analysis would be more appropriate if the PlioMIP models did not show a clear agreement on the changes for the MC climate, in which some models show very distinct results that could be masking important simulated features. However, without statistical significance analyses it is not possible to evaluate the usefulness of the cluster analysis. Also, the authors argue that the cluster analysis would reduce the influence of models of the same family in the MMM results, but it is not shown that models of the same family produce similar results. In fact, I found some results very different. SSTs from CESM2 are very different from all other CESM models. CCSM4-UoT is quite distant from CCSM4 and CESM1.2. NorESM models are several steps apart. Finally, the authors say that 'the MCM can avoid signals being overweighted from the same family of models, but one could argue that the MCM could also vanish changes that are simulated by most models. For example, cluster 3 of SST includes nearly half of the models analysed.

**A: We will add the statistical significance analyses to the cluster analysis.**

**As for the reduction of similar bias from models of the same family. This is a good point that we will add discussion to the paper.**

**Regarding to the MCM, the cluster analysis is most useful when the ensemble mean is made up form models that show a wide range of different results, with some grouping within these. We will make this clearer in the paper, and will add an explanation the number of group members needs to be considered when using this method.**

- ✓ Discussion, conclusions and abstract must be rewritten on the light of the comments above.

**A: We will edit our manuscripts based on the suggestions we received.**

## **Minor comments**

L 34: ITF must have units of transport and not temperature.

**A: This unit here is for the heat that ITF transported. In order to avoid mistake, we used the original text from the reference Sprintall et al. 2009.**

L 104: Review grammar of Q2 or rephrase it.

**A: We will rephrase it.**

L 107: Q4. It must be first demonstrated that there is a duplication of biases in the PlioMIP ensemble. Models' results from the same family can change quite substantially.

**A: We will add this context to the Q4.**

L135: The title of section 2.2 must be modified to not mislead the readers, once it is not performed any simulations specific to this study.

**A: We will change the title into 'PlioMIP2 experimental design'. This study is based on the background of the mid-Pliocene and how the hydroclimate of the MC change with the global climate. Therefore, we will change the title so that readers can know they are experiments designed in the PlioMIP2 project.**

Figure 3: The location of the sites used to construct this figure must be plotted in figure 1, otherwise it is not conducive for a good reading.

**A: This land-sea distribution map here we show is constructed from Dowsett et al. (2016) which is retrodicted with a set of procedures based on the paleogeographic maps of Markwick(2007). The symbols of sites will cover the coastal lines which is important information we want to show in this figure. In order to make it clear, we will indicate this in the figure caption.**

Figure 4: Do you use the mean SST around the MC to plot this figure? If so, this is not appropriate for the proxy-data because there are only a few sites around the MC.

**A: Yes. For the discrepancy of the pre-industrial simulation with observation data we use the mean different around the MC, since that's how we quantify the performance of models in simulating pre-industrial. We make this figure to compare model performance in simulating the climate of the MC in these two periods. For mid-Pliocene simulation performance quantification, there are a few sites of reconstructed temperature around the MC. As such, we will discuss about the uncertainties associated with the discrepancy in this section when interpreting this Figure.**

L 245: You cite fig. 6, but fig. 5 has not been cited yet.

**A: Thank you for reminding us. I will manage this in the revised manuscript.**

L 266-268: What do you mean by 'linearity is not exactly linear'? This sentence seems to be confusing what is shown on the plot.

**A: We will change this sentence into "the correlation is not exactly linearly".**

L 284-285: this sentence needs a better theoretical explanation.

**A: We will rephrase this sentence into: A large amount of precipitation provide energy to the atmosphere by releasing a large amount of latent heat, which fuels the atmospheric circulation.**

Figure 6 needs a statistical significance analysis with correlation coefficient and p-value.

**A: We will add statistical significance indicators to this figure.**

L 295: I suspect the SOS decrease in the North Indian Ocean maybe related to a northward shift of the ITCZ, which is an important feature of the MC climate.

**A: That's a good idea that we will test it and may add it to the discussion.**

L 301-304: This is a too simplicity view of the drivers of the ITF. The ITF is an important feature of the large-scale ocean circulation and is not driven by density gradients between the Pacific and Indian oceans.

**A: Thank you for clarifying it. We will change this sentence. Instead of talking about the drivers of the ITF, we will say the wind and density gradient are factors that can make contributions to the ITF.**

L 329: Results must be described with the assistance of statistical methods to quantify significance. Means and standard deviations? Medians and inter-quartile ranges?

**A: We will do the statistical significance analysis when calculate the water volume transport intensity. And we will show it in Figure 7b in the revised manuscript.**

L 351: Why it could be expected a reverse in the direction of the ITF?

**A: We are curious if the direction of the ITF ever changed in the paleo periods so in this sentence we point it out that the direction keeps the same as today.**

L 388: Why is it necessary to remove the regional mean SSTa in figure 9b?

**A: We cluster models based on the spatial pattern of SSTa without the influence of overall regional mean SSTa, as some of the models show much warmer mean SSTa than the other models. As such, we removed the mean regional SSTa.**

Figure 11: It is not possible to clearly see the colour corresponding to the proxy-data.

**A: We use this colour scale to fit the results from all the clusters and the proxy. In order to make it clearer, we will point out in the figure caption that the exact value is showed in Figure 3.**

Figures: All figures need statistical significance analyses in order to be more confident of the results described in the text.

**A: We will add statistical significance indicators to our results.**

#### **Reference:**

Dowsett, H. J., and Coauthors, 2016: The PRISM4 (mid-Piacenzian) paleoenvironmental reconstruction. *Clim. Past*, <https://doi.org/10.5194/CP-12-1519-2016>.

Markwick, P. J., 2007: The palaeogeographic and palaeoclimatic significance of climate proxies for data-model comparisons. *Geol. Soc. Spec. Publ.*, 251–312, <https://doi.org/10.1144/tms002.13>.

Oldeman, A. M., and Coauthors, 2021: Reduced El Niño variability in the mid-Pliocene according to the PlioMIP2 ensemble. *Clim. Past*, **17**, 2427–2450, <https://doi.org/10.5194/cp-17-2427-2021>.

Pontes, G., and Coauthors, 2021: Northward ITCZ shift drives reduced ENSO activity in the Mid-Pliocene Warm Period. *Nat. Geosci.*, **Preprint**, <https://doi.org/10.21203/RS.3.RS-402220/V1>.

Sprintall, J., S. E. Wijffels, R. Molcard, and I. Jaya, 2009: Direct estimates of the Indonesian throughflow entering the Indian Ocean: 2004-2006. *J. Geophys. Res. Ocean.*, **114**, 7001, <https://doi.org/10.1029/2008JC005257>.
